# Supplementary material for: The Arabidopsis non‐host defence‐associated coumarin scopoletin protects soybean from Asian soybean rust
Source: PubMed Central journal article supplement (PMC6852345; doi:10.1111/tpj.14426), 2019-07-01

a)

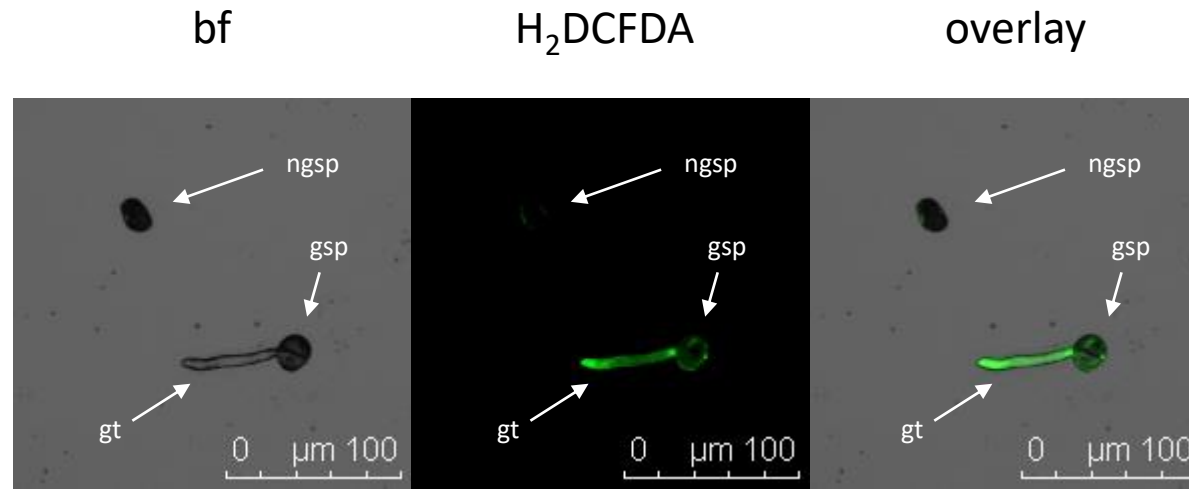

b)

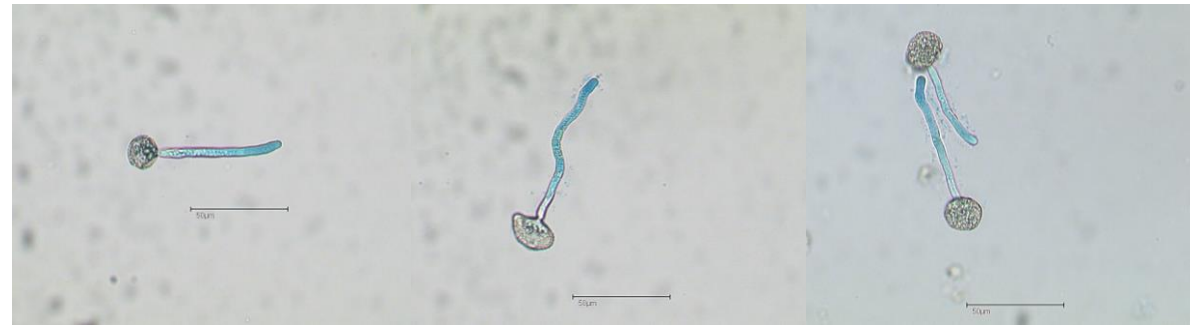

Supplement: TPJ-99-397-s005.pdf [file TPJ-99-397-s005.pdf]
